# Supplementary material for: Insulin Degludec/Insulin Aspart Administered Once Daily at Any Meal, With Insulin Aspart at Other Meals Versus a Standard Basal-Bolus Regimen in Patients With Type 1 Diabetes
Source: Oxford University Press journal article supplement (doi:10.2337/dc11-2503), 2012-08-30
Supplement: dc112503supplementarydata.pdf [file dc112503supplementarydata.pdf]

SUPPLEMENTARY DATA

**Supplementary Table 1.** Mean Total Daily Aspart Doses per Meal

|              |             |                  | <b>Breakfast</b> | <b>Lunch</b> | <b>Main evening meal</b> |
|--------------|-------------|------------------|------------------|--------------|--------------------------|
| <b>Visit</b> | <b>Unit</b> | <b>Treatment</b> | <b>Mean</b>      | <b>Mean</b>  | <b>Mean</b>              |
| Baseline     | U           | IDegAsp          | 9.85             | 10.05        | 11.10                    |
|              |             | IDet             | 8.75             | 9.44         | 10.55                    |
|              | U/kg        | IDegAsp          | 0.13             | 0.13         | 0.14                     |
|              |             | IDet             | 0.12             | 0.12         | 0.14                     |
| End of trial | U           | IDegAsp          | 12.27            | 13.75        | 13.22                    |
|              |             | IDet             | 12.60            | 14.22        | 15.44                    |
|              | U/kg        | IDegAsp          | 0.15             | 0.17         | 0.16                     |
|              |             | IDet             | 0.16             | 0.18         | 0.20                     |

**Supplementary Table 2.** Hypoglycemia data

|                  | <b>IDegAsp OD (n = 362)</b> |      |               |             | <b>IDet (n = 180)</b> |      |               |             | <b>Rate ratio</b> | <b>P-values</b> |
|------------------|-----------------------------|------|---------------|-------------|-----------------------|------|---------------|-------------|-------------------|-----------------|
|                  | <b>Patients</b>             |      | <b>Events</b> | <b>Rate</b> | <b>Patients</b>       |      | <b>Events</b> | <b>Rate</b> |                   |                 |
|                  | <i>n</i>                    | %    | <i>n</i>      | per PYE     | <i>n</i>              | %    | <i>n</i>      | per PYE     |                   |                 |
| <b>Severe</b>    | 35                          | 9.7  | 56            | 0.33        | 22                    | 12.2 | 35            | 0.42        | 1.19 [0.58; 2.41] | NS              |
| <b>Confirmed</b> | 341                         | 94.2 | 6634          | 39.17       | 168                   | 93.3 | 3720          | 44.34       | 0.91 [0.76; 1.09] | NS              |
| <b>Nocturnal</b> | 192                         | 53.0 | 629           | 3.71        | 125                   | 69.4 | 480           | 5.72        | 0.63 [0.49; 0.81] | <i>P</i> < 0.05 |

CI, confidence interval; IDegAsp, insulin degludec/insulin aspart; IDet, insulin detemir; NS, not significant; OD, once daily; PYE, patient-year of exposure

SUPPLEMENTARY DATA

**Supplementary Table 3.** Adverse event rate data

|                                             | <b>IDegAsp OD</b> | <b>IDet</b> |
|---------------------------------------------|-------------------|-------------|
| All patients                                | 362               | 180         |
| Patients with events                        | 239               | 114         |
| Percentage of patients with events          | 66.0%             | 63.3%       |
| Number of events                            | 846               | 436         |
| <b>Adverse event rate per PYE</b>           | <b>5.00</b>       | <b>5.20</b> |
| Number of patients with serious AEs         | 31                | 13          |
| Percentage of patients with serious AEs     | 8.6%              | 7.2%        |
| Number of events                            | 46                | 17          |
| <b>Serious adverse event rate per PYE</b>   | <b>0.27</b>       | <b>0.20</b> |
| Number of patients withdrawn due to AEs     | 4                 | 3           |
| Percentage of randomized patients withdrawn | 1.1%              | 1.6%        |

AE, adverse event; IDegAsp, insulin degludec/insulin aspart; IDet, insulin detemir; OD, once daily; PYE, patient-year of exposure

SUPPLEMENTARY DATA

**Supplementary Table 4.** Adverse events reported with an incidence  $\geq 5\%$  patients

|                                           | IDegAsp OD<br><i>n</i> = 362 |      |        |      | IDet<br><i>n</i> = 180 |      |        |      |
|-------------------------------------------|------------------------------|------|--------|------|------------------------|------|--------|------|
|                                           | <i>n</i>                     | %    | Events | Rate | <i>n</i>               | %    | Events | Rate |
| Events                                    | 130                          | 35.9 | 287    | 1.69 | 71                     | 39.4 | 129    | 1.54 |
| <b>Infections and infestations</b>        |                              |      |        |      |                        |      |        |      |
| Nasopharyngitis                           | 78                           | 21.5 | 111    | 0.66 | 32                     | 17.8 | 44     | 0.52 |
| Upper respiratory tract infection         | 24                           | 6.6  | 33     | 0.19 | 16                     | 8.9  | 26     | 0.31 |
| <b>Nervous system disorders</b>           |                              |      |        |      |                        |      |        |      |
| Headache                                  | 27                           | 7.5  | 83     | 0.49 | 15                     | 8.3  | 18     | 0.21 |
| <b>Gastrointestinal disorders</b>         |                              |      |        |      |                        |      |        |      |
| Diarrhea                                  | 10                           | 2.8  | 11     | 0.06 | 9                      | 5.0  | 9      | 0.11 |
| <b>Metabolism and nutrition disorders</b> |                              |      |        |      |                        |      |        |      |
| Hypoglycemia                              | 33                           | 9.1  | 49     | 0.29 | 22                     | 12.2 | 32     | 0.38 |

IDegAsp, insulin degludec/insulin aspart; IDet, insulin detemir; OD, once daily

**Supplementary Table 5.** Serious adverse events possibly/probably related to trial therapy

|                                                       | IDegAsp OD<br><i>n</i> = 362 |     |        |      | IDet<br><i>n</i> = 180 |     |        |      |
|-------------------------------------------------------|------------------------------|-----|--------|------|------------------------|-----|--------|------|
|                                                       | <i>n</i>                     | %   | Events | Rate | <i>n</i>               | %   | Events | Rate |
| Events                                                | 15                           | 4.1 | 25     | 0.15 | 5                      | 2.8 | 7      | 0.08 |
| <b>Metabolism and nutrition disorders</b>             |                              |     |        |      |                        |     |        |      |
| Hypoglycemia                                          | 10                           | 2.8 | 18     | 0.11 | 4                      | 2.2 | 4      | 0.05 |
| Hypoglycemic unconsciousness                          | 4                            | 1.1 | 4      | 0.02 | 2                      | 1.1 | 2      | 0.02 |
| Hypoglycemic seizure                                  | 1                            | 0.3 | 1      | 0.01 | 1                      | 0.6 | 1      | 0.01 |
| <b>Injury, poisoning and procedural complications</b> |                              |     |        |      |                        |     |        |      |
| Wrong drug administered                               | 2                            | 0.6 | 2      | 0.01 | 0                      | 0.0 | 0      | 0.00 |

IDegAsp, insulin degludec/insulin aspart; IDet, insulin detemir; OD, once daily

**S6.** List of principal investigators

**Australia:** Geoffrey Nicholson, Anthony Roberts, Richard Simpson, Sultan Linjawi, David O’Neal, Glynis Ross, Thomas Donnelly

**Denmark:** Kjeld Hermansen, Hans Henrik Lervang, Lise Tarnow

**France:** Jean-Paul Donnet, Jean-Pierre Courreges, Thierry Gabreau

**Israel:** Moshe Phillip, Orit Hamiel, Eli Hershkovitz, Josef Cohen

**Poland:** Edward Franek, Katarzyna Jusiak, Katarzyna Cypryk, Elzbieta Czerniawska, Irena Babol, Jaroslaw Ogonowski

**Romania:** Ioan Veresiu, Radu Lichiardopol, Minola Strugariu, Ella Pintilei, Silviana Constantinescu, Camelia Pruna, Eugenia Farcasiu, Ioana Ferariu

**Russian Federation:** Marina Shestakova, Emma Voychik, Nelli Verbovaya, Galina Reshedko, Marina Kunitsina, Ludmila Zarutskaya, Larisa Zhukova, Ludmila Kvitkova, Natalia Vorokhobina, Marina Sergeeva-Kondrachenko, Tatyana Rodionova

**United Kingdom:** Melanie Davies, Martin Gibson, Alan Jaap, Andrew Johnson, John Lorains, David Matthews, Ewan Pearson, Jiten Vora

**United States:** Bruce Bode, Jolene Berg, Stephen Cohen, Angel Comulada-Rivera, Robert Cuddihy, Anthony Dulgeroff, Raymond Fink, David Fitz-Patrick, Gregg Gerety, Janice Gilden, J Michael Gonzalez-Campoy, Irl Hirsch, Allen King, Elise Kwon, William Litchfield, Kathryn Lucas, Minh Mach, Lyle Myers, Ola Odugbesan, John Pullman, Maria Ramos-Roman, John Reed, Bradd Silver, Teresa Sligh, Peter Weissman

SUPPLEMENTARY DATA

**S7. CONSORT 2010 checklist of information to include when reporting a randomised trial\***

| Section/Topic                  | Item no. | Checklist item                                                                                                                                                                              | Reported on page no. |
|--------------------------------|----------|---------------------------------------------------------------------------------------------------------------------------------------------------------------------------------------------|----------------------|
| <b>Title and abstract</b>      |          |                                                                                                                                                                                             |                      |
|                                | 1a       | Identification as a randomised trial in the title                                                                                                                                           | 1                    |
|                                | 1b       | Structured summary of trial design, methods, results, and conclusions (for specific guidance see CONSORT for abstracts)                                                                     | 3                    |
| <b>Introduction</b>            |          |                                                                                                                                                                                             |                      |
| Background and objectives      | 2a       | Scientific background and explanation of rationale                                                                                                                                          | 4–6                  |
|                                | 2b       | Specific objectives or hypotheses                                                                                                                                                           | 6                    |
| <b>Methods</b>                 |          |                                                                                                                                                                                             |                      |
| Trial design                   | 3a       | Description of trial design (such as parallel, factorial) including allocation ratio                                                                                                        | 6, 7                 |
|                                | 3b       | Important changes to methods after trial commencement (such as eligibility criteria), with reasons                                                                                          | NA                   |
| Participants                   | 4a       | Eligibility criteria for participants                                                                                                                                                       | 7                    |
|                                | 4b       | Settings and locations where the data were collected                                                                                                                                        | 6                    |
| Interventions                  | 5        | The interventions for each group with sufficient details to allow replication, including how and when they were actually administered                                                       | 8, 9                 |
| Outcomes                       | 6a       | Completely defined pre-specified primary and secondary outcome measures, including how and when they were assessed                                                                          | 9, 10                |
|                                | 6b       | Any changes to trial outcomes after the trial commenced, with reasons                                                                                                                       | NA                   |
| Sample size                    | 7a       | How sample size was determined                                                                                                                                                              | 10                   |
|                                | 7b       | When applicable, explanation of any interim analyses and stopping guidelines                                                                                                                | NA                   |
| Randomisation:                 |          |                                                                                                                                                                                             |                      |
| Sequence generation            | 8a       | Method used to generate the random allocation sequence                                                                                                                                      | 7, 8                 |
|                                | 8b       | Type of randomisation; details of any restriction (such as blocking and block size)                                                                                                         | 7, 8                 |
| Location concealment mechanism | 9        | Mechanism used to implement the random allocation sequence (such as sequentially numbered containers), describing any steps taken to conceal the sequence until interventions were assigned | 7, 8                 |
| Implementation                 | 10       | Who generated the random allocation sequence, who enrolled participants, and who assigned participants to interventions                                                                     | 7, 8                 |
| Blinding                       | 11a      | If done, who was blinded after assignment to interventions (for example, participants, care providers, those assessing outcomes) and how                                                    | 7, 8                 |
|                                | 11b      | If relevant, description of the similarity of interventions                                                                                                                                 | NA                   |
| Statistical methods            | 12a      | Statistical methods used to compare groups for primary and secondary outcomes                                                                                                               | 10, 11               |
|                                | 12b      | Methods for additional analyses, such as subgroup analyses and adjusted analyses                                                                                                            | 10, 11               |
| <b>Results</b>                 |          |                                                                                                                                                                                             |                      |

SUPPLEMENTARY DATA

|                                                      |     |                                                                                                                                                   |                                                                             |
|------------------------------------------------------|-----|---------------------------------------------------------------------------------------------------------------------------------------------------|-----------------------------------------------------------------------------|
| Participant flow (a diagram is strongly recommended) | 13a | For each group, the numbers of participants who were randomly assigned, received intended treatment, and were analysed for the primary outcome    | Figure 1                                                                    |
|                                                      | 13b | For each group, losses and exclusions after randomisation, together with reasons                                                                  | Figure 1                                                                    |
| Recruitment                                          | 14a | Dates defining the periods of recruitment and follow-up                                                                                           | 6                                                                           |
|                                                      | 14b | Why the trial ended or was stopped                                                                                                                | NA                                                                          |
| Baseline data                                        | 15  | A table showing baseline demographic and clinical characteristics for each group                                                                  | Table 1                                                                     |
| Numbers analysed                                     | 16  | For each group, number of participants (denominator) included in each analysis and whether the analysis was by original assigned groups           | Figure 1                                                                    |
| Outcomes and estimation                              | 17a | For each primary and secondary outcome, results for each group, and the estimated effect size and its precision (such as 95% confidence interval) | 11–15, Figs 2 + 3, Suppl. Table 1 + 2                                       |
|                                                      | 17b | For binary outcomes, presentation of both absolute and relative effect sizes is recommended                                                       | NA                                                                          |
| Ancillary analyses                                   | 18  | Results of any other analyses performed, including subgroup analyses and adjusted analyses, distinguishing pre-specified from exploratory         | 11–15                                                                       |
| Harms                                                | 19  | All important harms or unintended effects in each group (for specific guidance see CONSORT for harms)                                             | 15, Suppl. Tables S3–5                                                      |
| <b>Discussion</b>                                    |     |                                                                                                                                                   |                                                                             |
| Limitations                                          | 20  | Trial limitations, addressing sources of potential bias, imprecision, and, if relevant, multiplicity of analyses                                  | 15–18                                                                       |
| Generalisability                                     | 21  | Generalisability (external validity, applicability) of the trial findings                                                                         | 15–18                                                                       |
| Interpretation                                       | 22  | Interpretation consistent with results, balancing benefits and harms, and considering other relevant evidence                                     | 15–18                                                                       |
| <b>Other information</b>                             |     |                                                                                                                                                   |                                                                             |
| Registration                                         | 23  | Registration number and name of trial registry                                                                                                    | 2, 6                                                                        |
| Protocol                                             | 24  | Where the full trial protocol can be accessed, if available                                                                                       | The full protocol is not publicly available but can be supplied on request. |
| Funding                                              | 25  | Sources of funding and other support (such as supply of drugs), role of funders                                                                   | 18                                                                          |

\*We strongly recommend reading this statement in conjunction with the CONSORT 2010 Explanation and Elaboration for important clarifications on all the items. If relevant, we also recommend reading CONSORT extensions for cluster randomised trials, non-inferiority and equivalence trials, non-pharmacological treatments, herbal interventions, and pragmatic trials. Additional extensions are forthcoming: for those and for up to date references relevant to this checklist, see [www.consort-statement.org](http://www.consort-statement.org).
